# Supplementary material
Source: PubMed Central journal article supplement (PMC3783524)
Supplement: NIHMS502337-supplement-1_si_001.pdf [file NIHMS502337-supplement-1_si_001.pdf]

## SUPPORTING INFORMATION

### **Inhibitors of Difficult Protein-Protein Interactions Identified by High Throughput Screening of Multi-Protein Complexes**

Laura C. Cesa<sup>+</sup>, Srikanth Patury<sup>+</sup>, Tomoko Komiyama, Atta Ahmad, Erik R. P. Zuiderweg and Jason E. Gestwicki<sup>\*</sup>

Departments of Pathology and Biological Chemistry and the Life Sciences Institute  
University of Michigan, Ann Arbor, MI 48109-2216

**Supplemental Figure 1.** Characterization of the DnaK, DnaJ and GrpE proteins and additional information on the high throughput screening results, including the chemical structures of the active molecules.

**Supplemental Figure 2.** Control and characterization of Zaf as an inhibitor of DnaK-DnaJ-GrpE, including raw tryptophan fluorescence, competition studies and peptide substrate binding.

**Supplemental Figure 3.** List of residues in DnaK's NBD and the chemical shift perturbations from Tel binding, as measured by NMR.

**Supplemental Figure 4.** Controls and characterization of Tel as an inhibitor of DnaK-DnaJ-GrpE, including ITC data, nucleotide binding and peptide substrate binding.

(A) Characterization of the effects of DnaJ, GrpE and peptide substrate on ATP turnover by DnaK

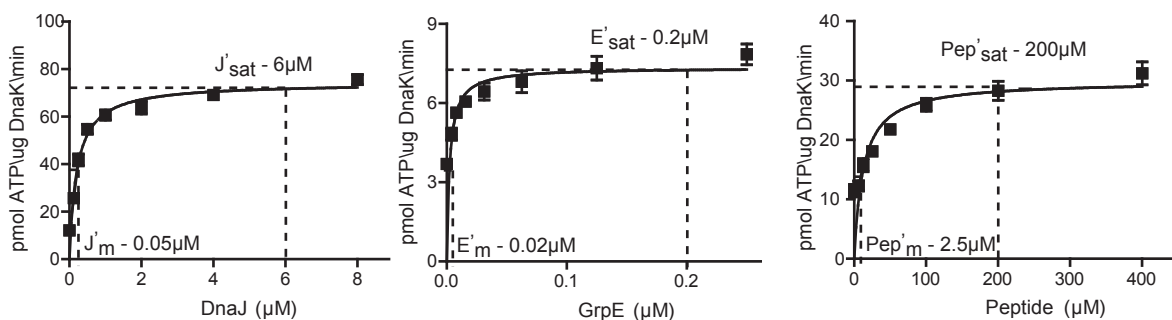

(B) Samples of the screening results

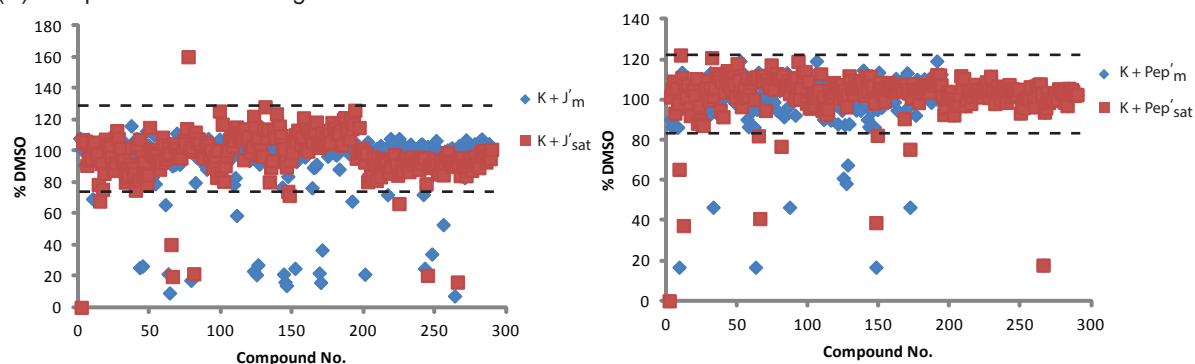

(C) Structures of selective DnaK-DnaJ and DnaK-GrpE inhibitors from the primary HTS

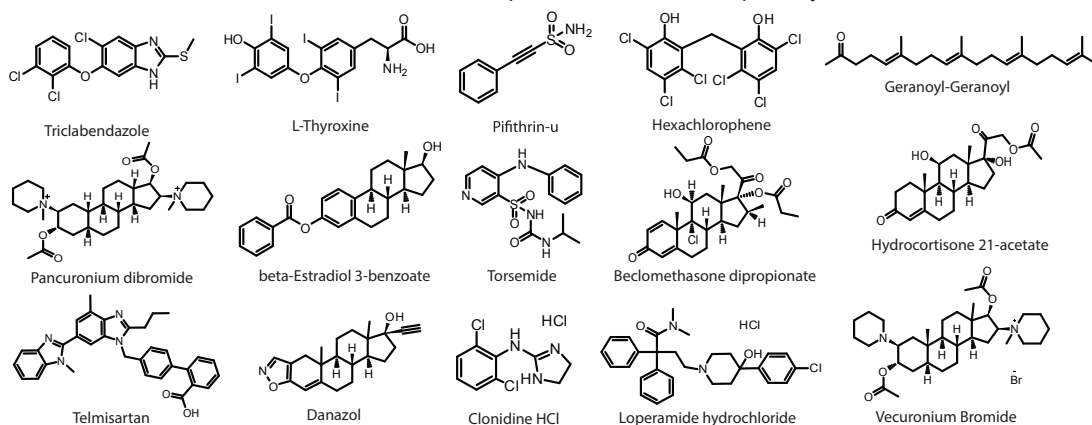

**Suppl. Fig 1.** Additional details and results from the parallel HTS campaigns. (A) Characterization of the stimulatory effects of DnaJ, GrpE and NRLLLTG peptide on ATP turnover, as measured by malachite green. Results are the representative averages of triplicates of three independent experiments, and error is SEM. Data were fit to the Michaelis-Menten equation. The saturation (sat) and half-maximal (m) values are shown. DnaK = 0.4  $\mu$ M. (B) Representative examples of the primary, raw screening results, highlighting the effects of saturating non-enzyme partner. (C) Chemical structures of the molecules re-purified and confirmed as inhibitors of DnaK-DnaJ or DnaK-GrpE.

A. Tryptophan fluorescence spectra

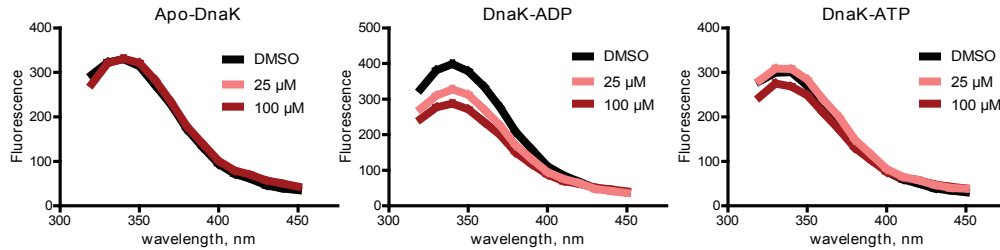

B. Zaf binds weakly to apo- and ATP-bound DnaK

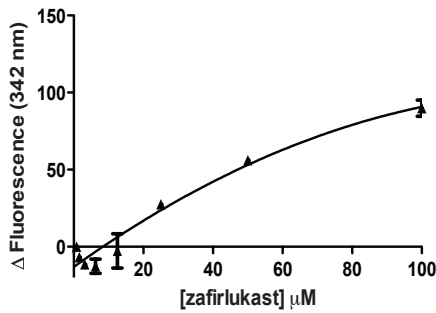

C. Zaf does not compete with a fluorescent ATP analog

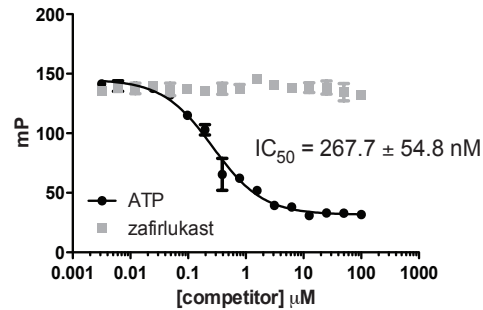

D. DnaK binding to FITC-HLA peptide

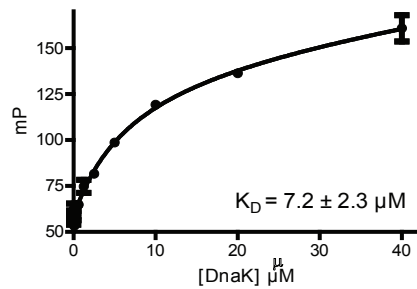

E. NRLLTG peptide and tau compete for binding of FITC-HLA to DnaK

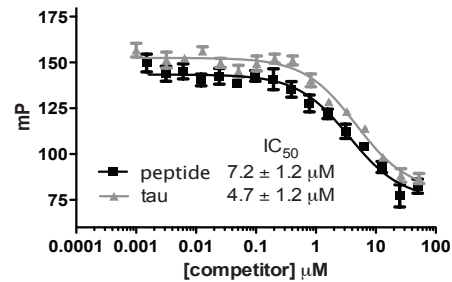

**Suppl. Fig 2.** Controls and characterization of Zaf activity in the DnaK-DnaJ-GrpE systems. (A) Raw tryptophan fluorescence spectra of Zaf binding to DnaK in the apo ADP- and ATP-bound forms. Nucleotide was added at 1 mM. Signal for Zaf alone was subtracted. (B) Zaf binds very weakly to the ATP-bound form of DnaK, as measured by tryptophan fluorescence (see Fig 3A for the ADP results). (C) Zaf does not compete with fluorescent nucleotide for binding to DnaK. ATP is shown as a positive control. (D) DnaK binds to the FITC-HLA peptide, similar to what was previously reported for human Hsp72. (E) As positive controls, both NRLLTG peptide and human tau compete for binding with the FITC-HLA, showing that binding occurs in the SBD. Results are the representative averages of triplicates of three independent experiments, and error bars represent SEM. Binding data were fit to the Langmuir binding equation; inhibition data were fit to the Hill equation.

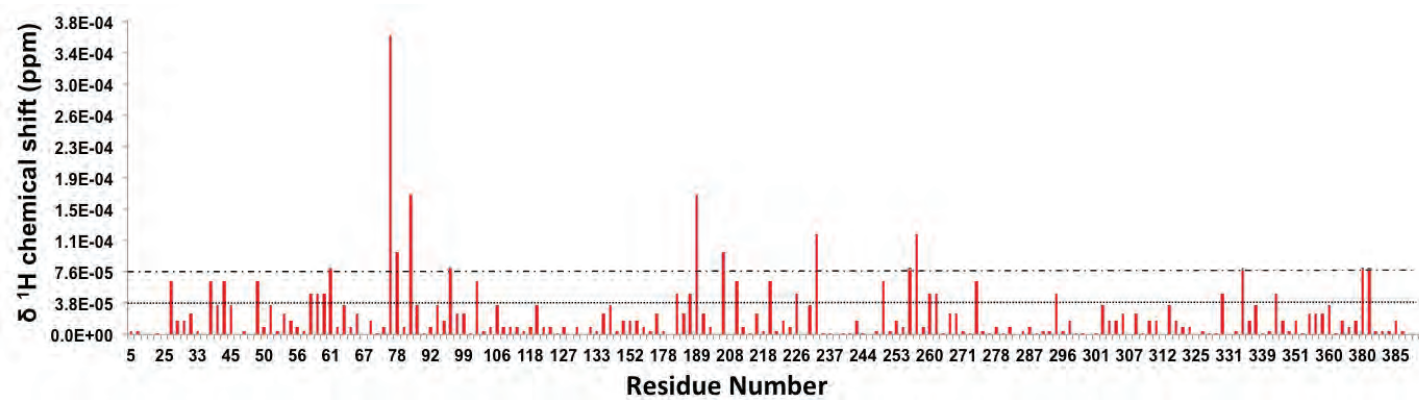

**Suppl. Figure 3.** Tel binds DnaK<sub>NBD</sub> by NMR. Quantification of the changes in the proton NMR chemical shifts after Tel treatment. The dotted line represents the standard deviation of all the changes (s); the dashed line represents 2s.

A. Tel does not block DnaK-GrpE by fluorescence quenching

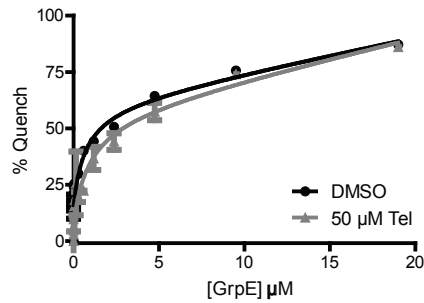

B. Tel does not affect binding of FITC-HLA to DnaK

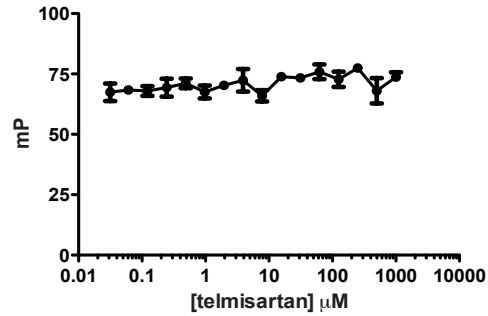

C. Tel modestly reduces affinity of DnaK for fluorescent nucleotide

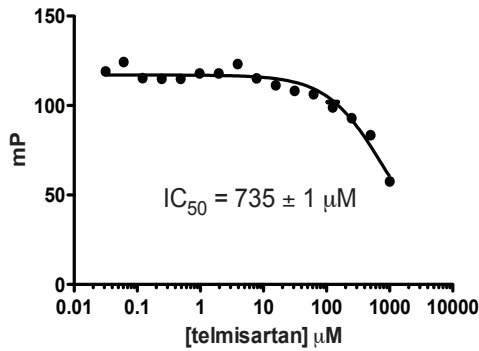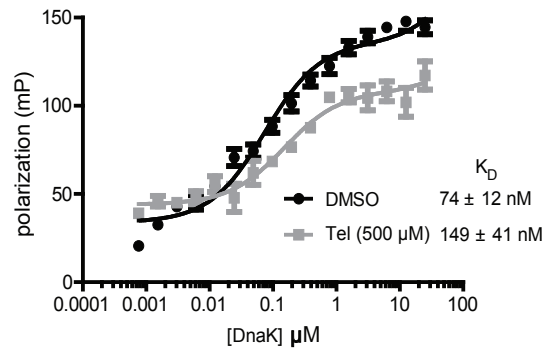

D. Tel does not bind DnaJ by ITC

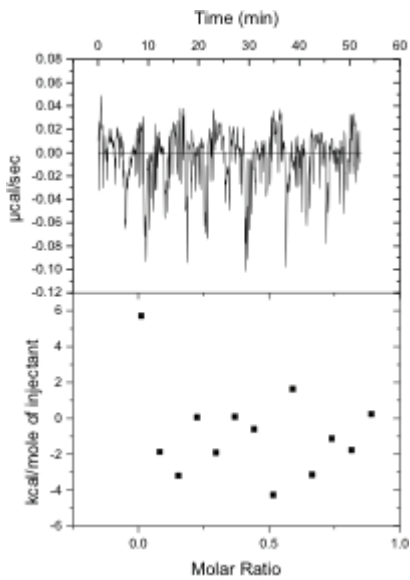

E. Tel does not bind GrpE by ITC

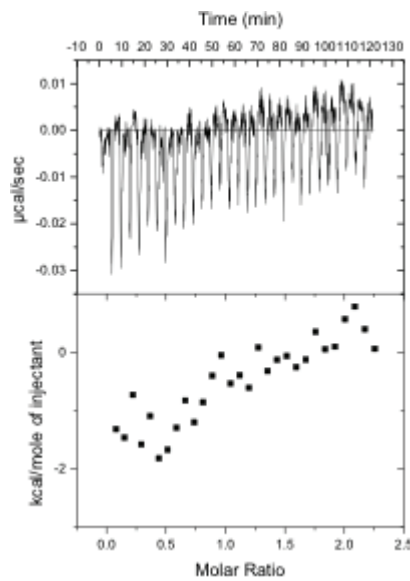

**Suppl. Fig 4.** Characterization of Tel effects on binding to GrpE and peptide substrate. (A) Labeled DnaK binding to GrpE was measured as in Fig 3B. Tel did not have any effect on the apparent affinity. ( $p = 0.33$ ) (B) Tel did not inhibit binding of DnaK to the FITC-HLA peptide. (C) Tel inhibits binding of fluorescent nucleotide (FAM-ATP) to DnaK, as measured by FP. All results are the representative averages of triplicates of three independent experiments, and error bars represent SEM. Binding data were fit to the Langmuir binding equation; inhibition data were fit to the Hill equation. Tel did not bind to either DnaJ (D) or GrpE (E), as measured by ITC.
